# Supplementary material for: Deciphering the Role of the rs2651899, rs10166942, and rs11172113 Polymorphisms in Migraine: A Meta-Analysis
Source: Medicina (Kaunas). 2022 Mar 29;58(4):491. doi: 10.3390/medicina58040491 (PMC9031971; doi:10.3390/medicina58040491)
Supplement: Supplementary file 1 [file medicina-58-00491-s001.zip]

Archive with 14 entries (14 files):
- Supplementary File S1.pdf
- Supplementary File S10.pdf
- Supplementary File S11.pdf
- Supplementary File S12.pdf
- Supplementary File S13.pdf
- Supplementary File S14.pdf
- Supplementary File S2.pdf
- Supplementary File S3.pdf
- Supplementary File S4.pdf
- Supplementary File S5.pdf
- Supplementary File S6.pdf
- Supplementary File S7.pdf
- Supplementary File S8.pdf
- Supplementary File S9.pdf
