# Supplementary figures and images for: Deciphering the Role of the rs2651899, rs10166942, and rs11172113 Polymorphisms in Migraine: A Meta-Analysis
Source: MDPI journal article supplement (doi:10.3390/medicina58040491), 2022-03-29

LPR1 rs11172113

CC

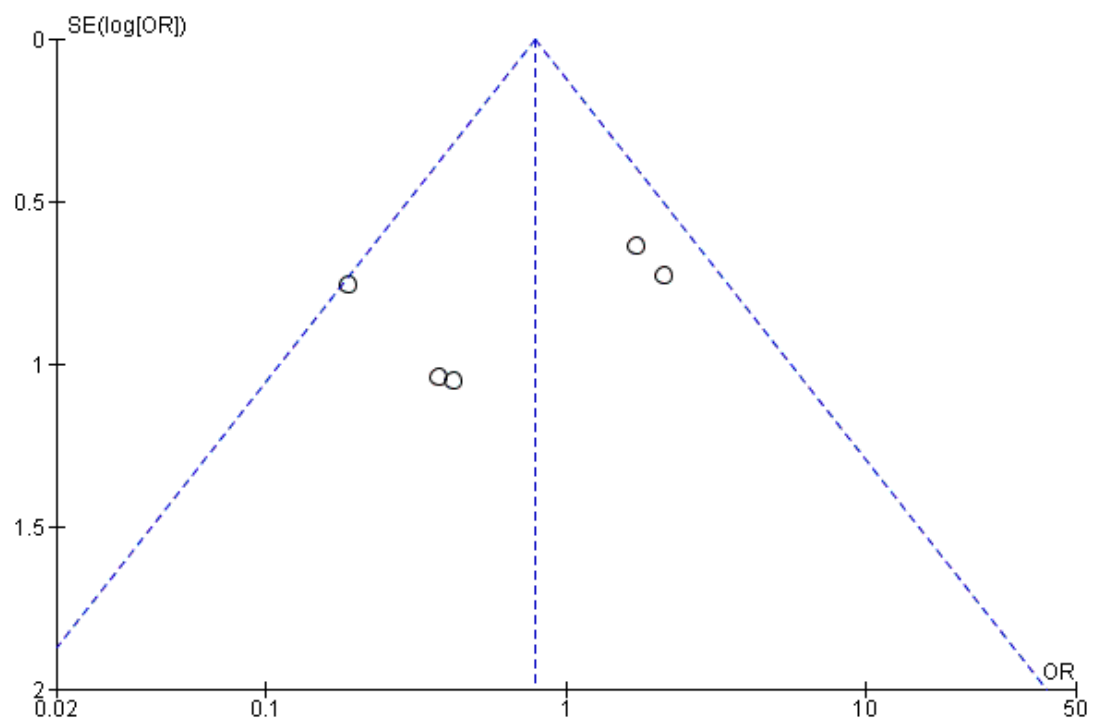

CT

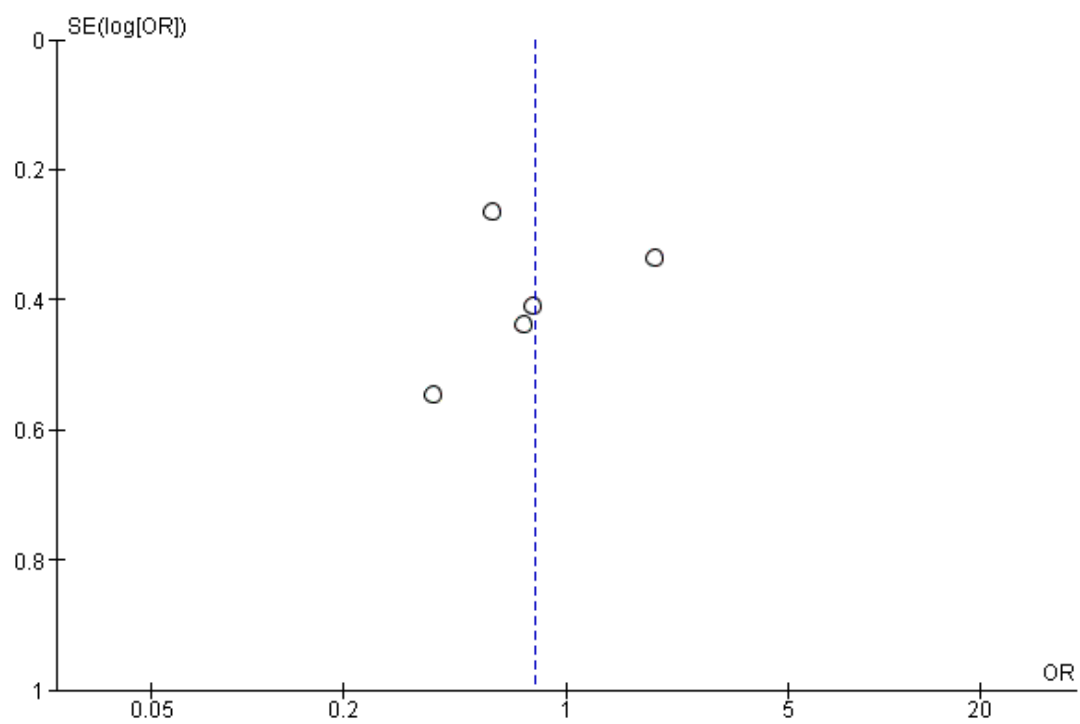

$\pi$

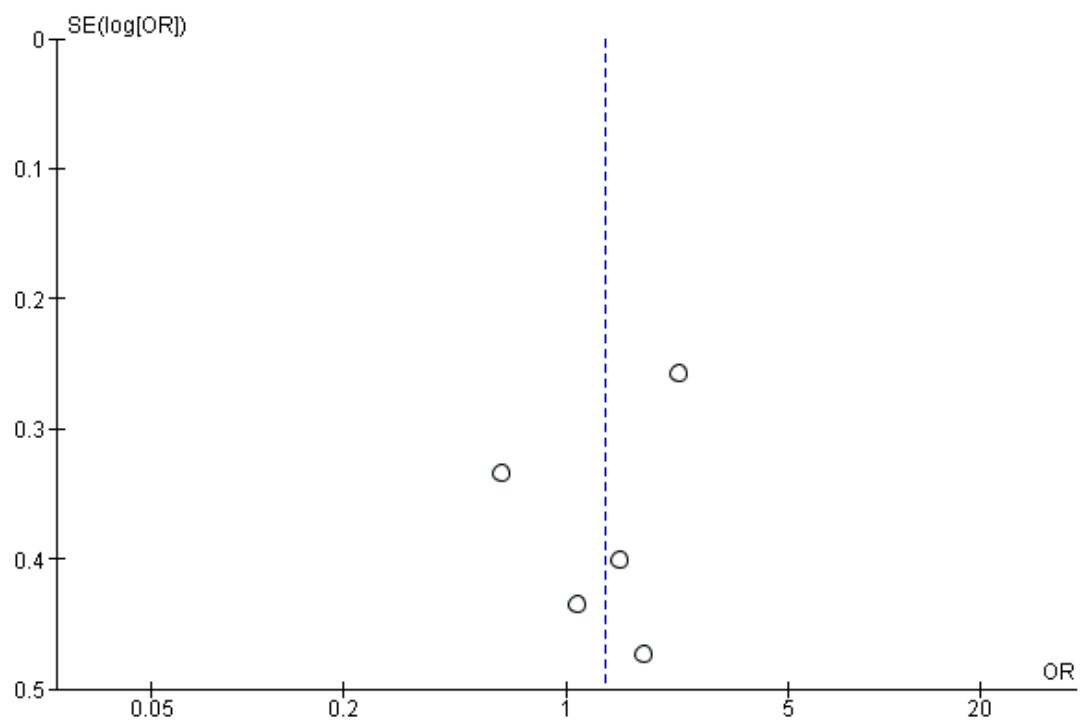

Supplement: s1 [file s1]

rs10166942 near TRPM8 gene

CC

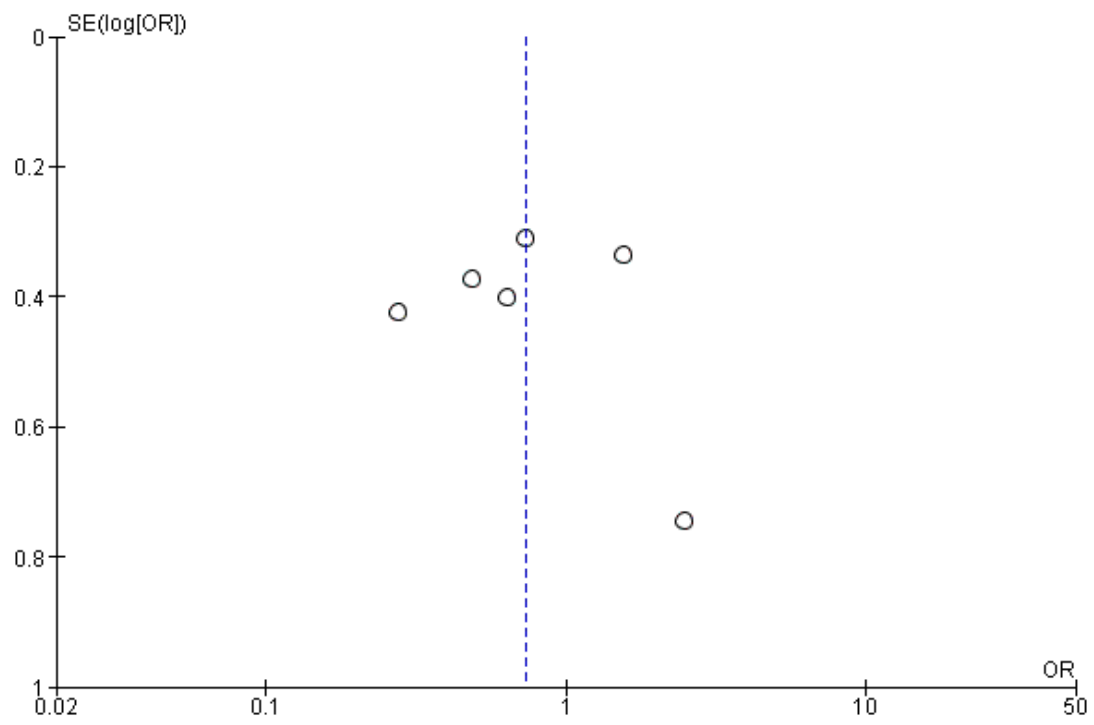

CT

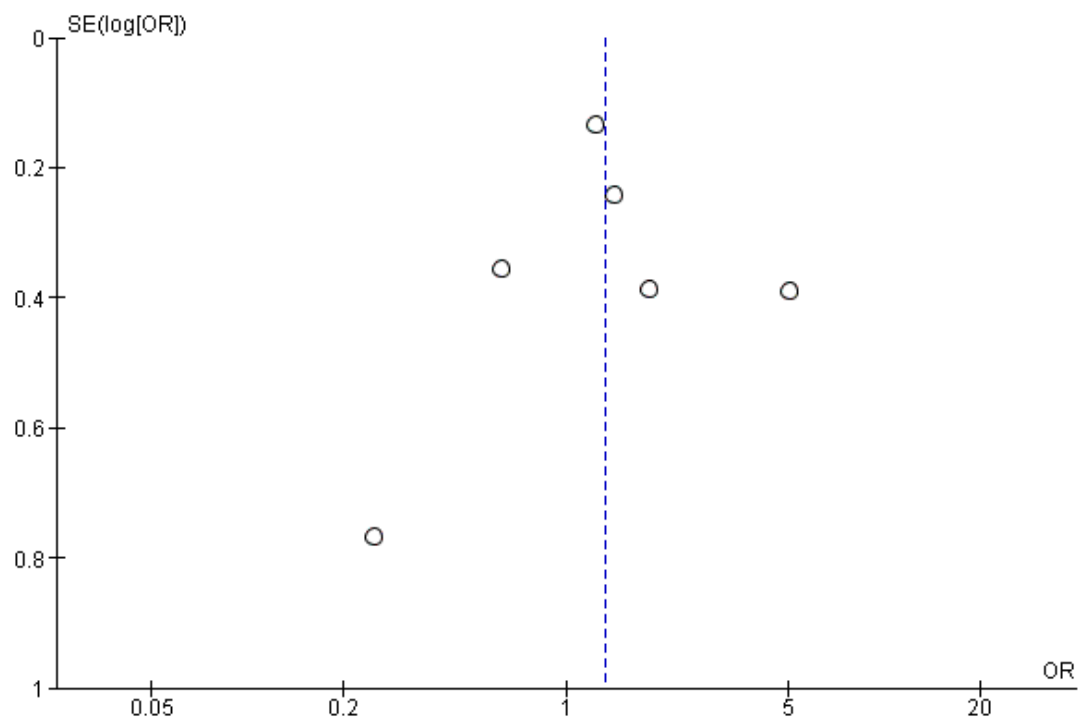

$\pi$

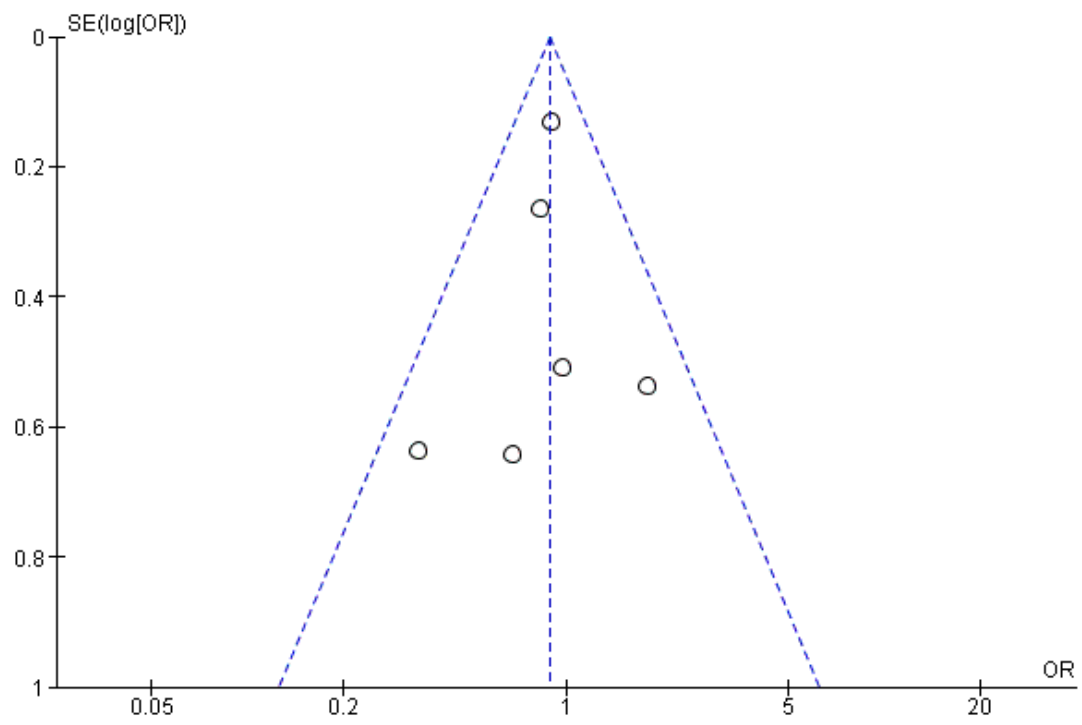

Supplement: s1 [file s1]

rs10166942 near TRPM8 gene

CC

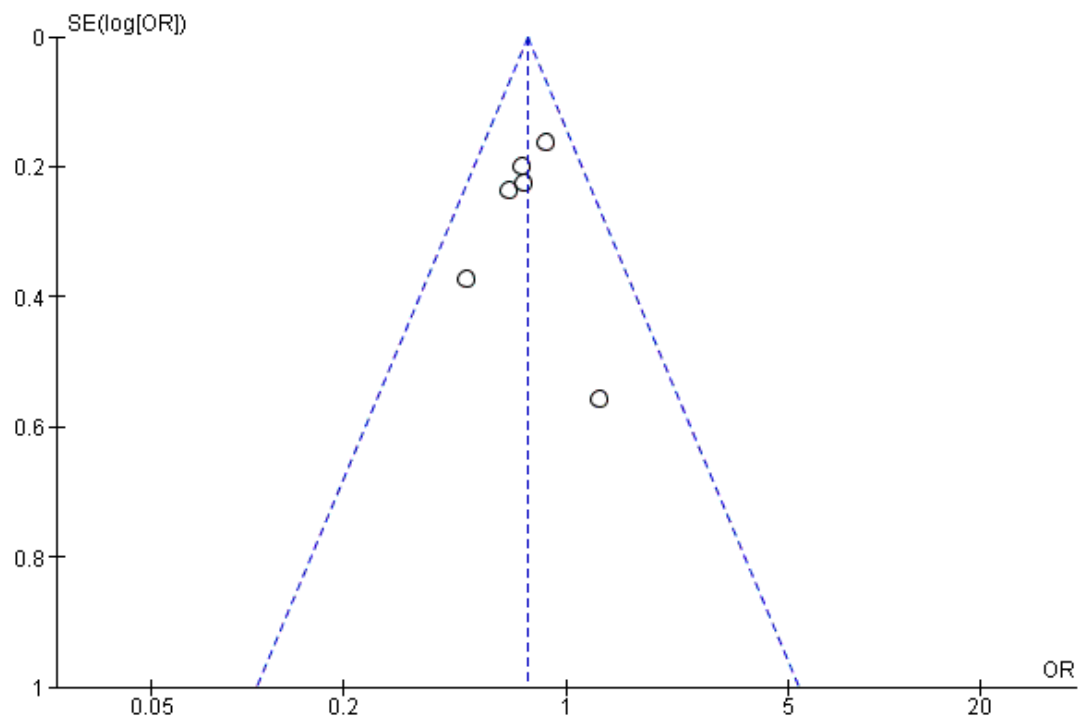

CT

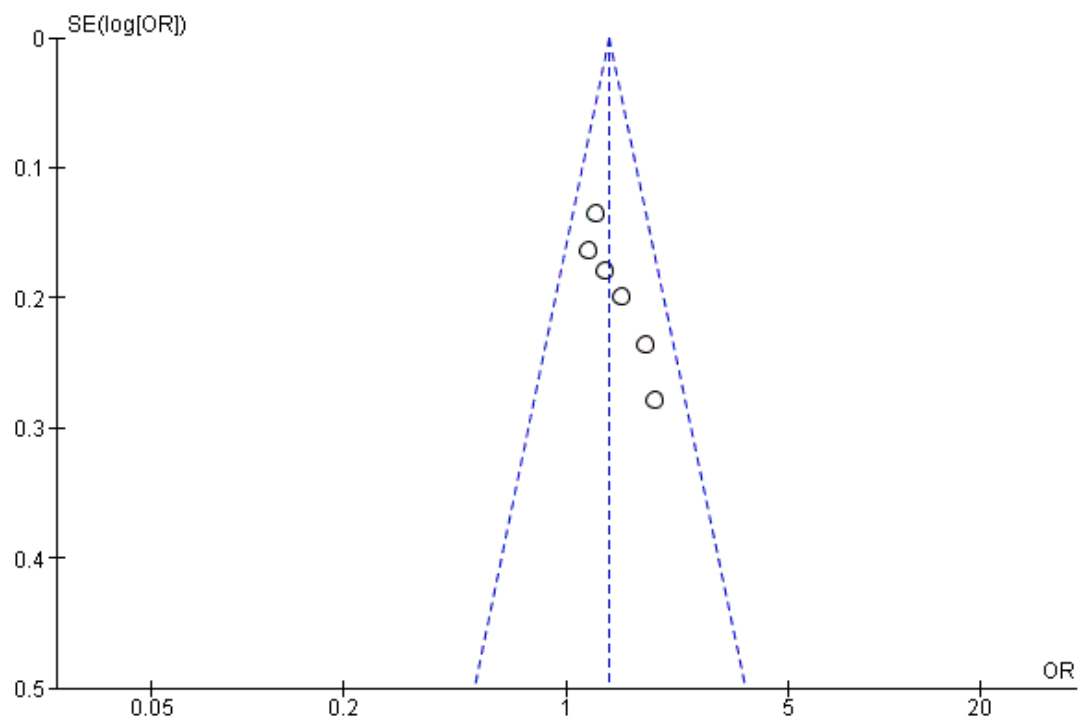

$\pi$

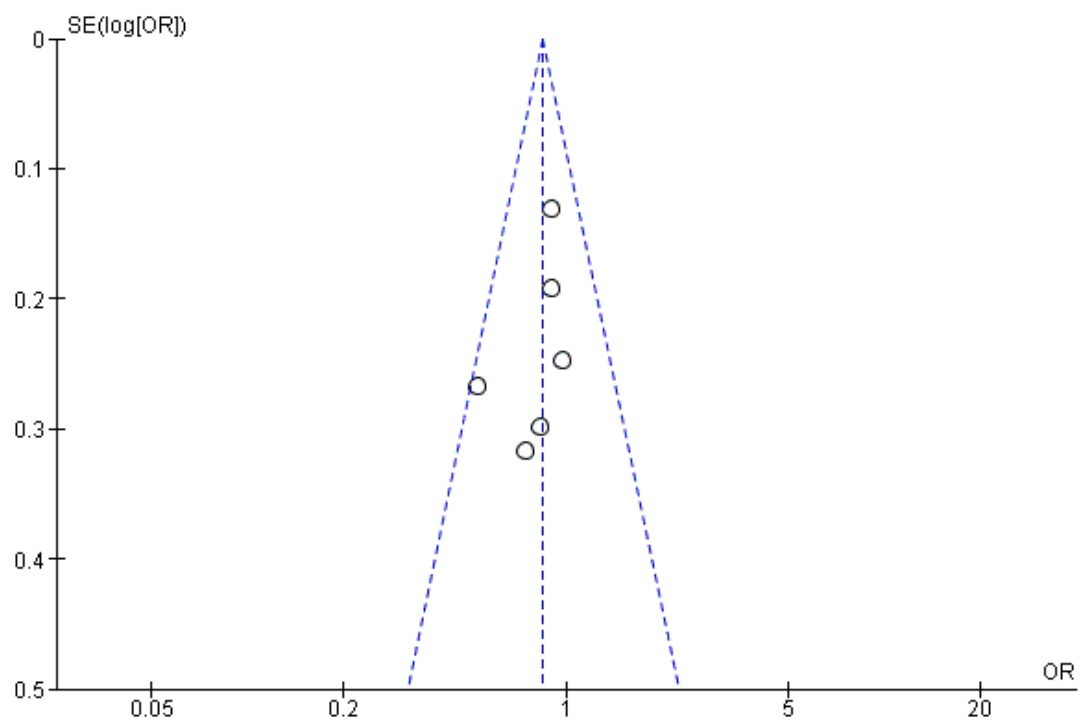

Supplement: s1 [file s1]

CC

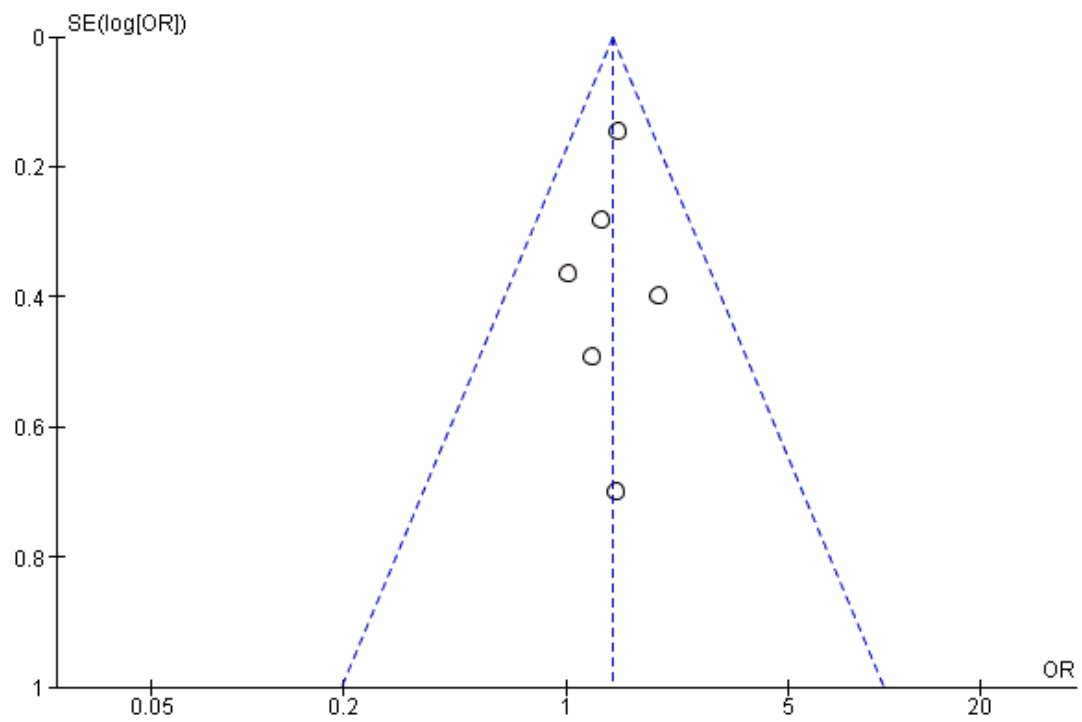

CT

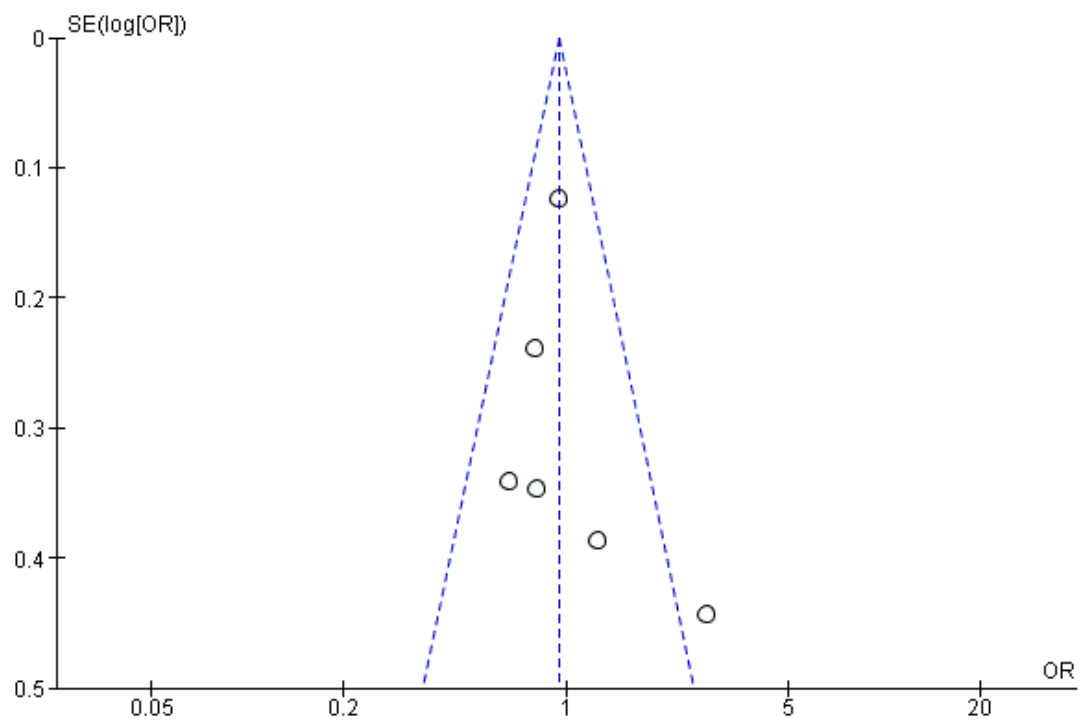

$IT$

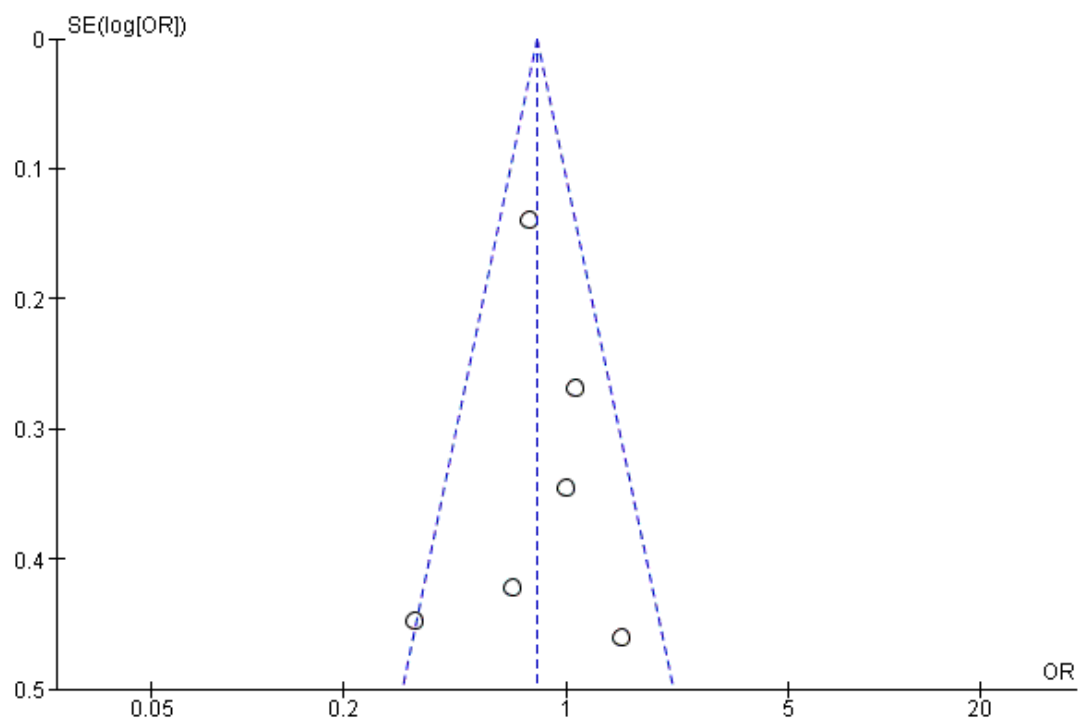

Supplement: s1 [file s1]

PRDM16 rs2651899

CC

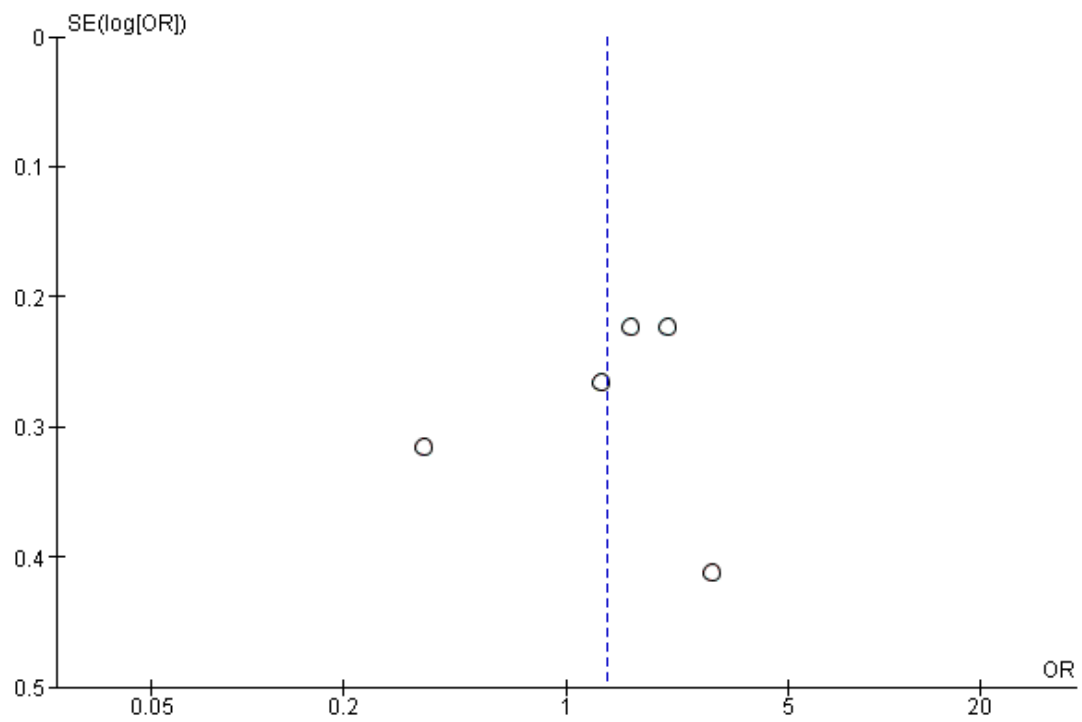

CT

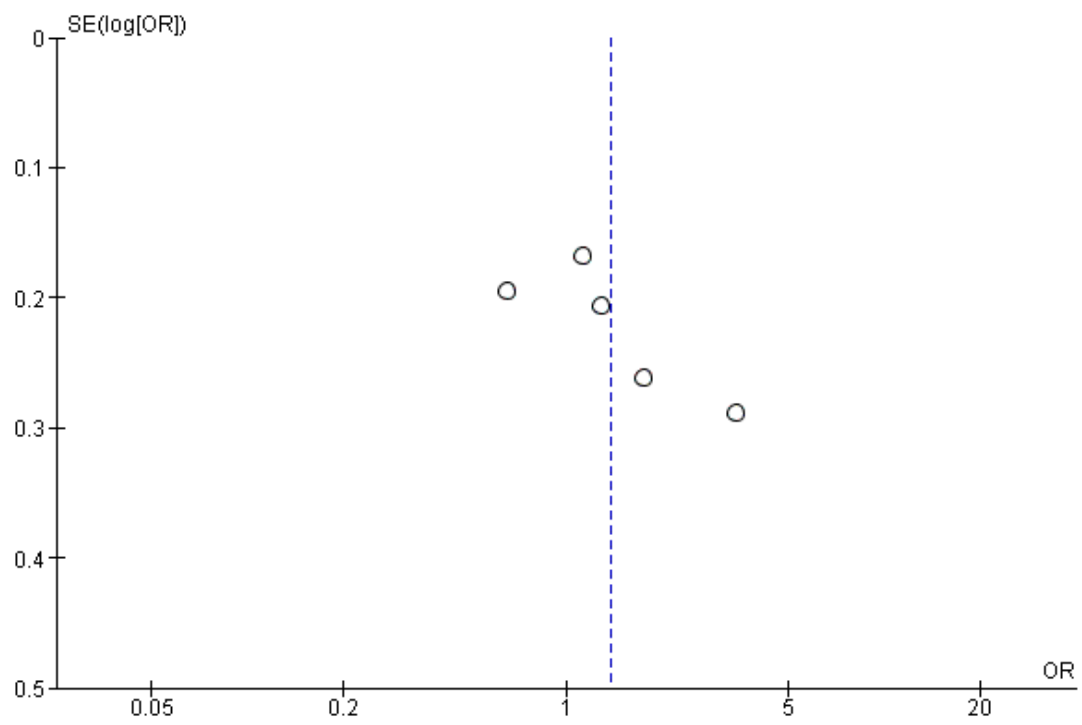

$\pi$

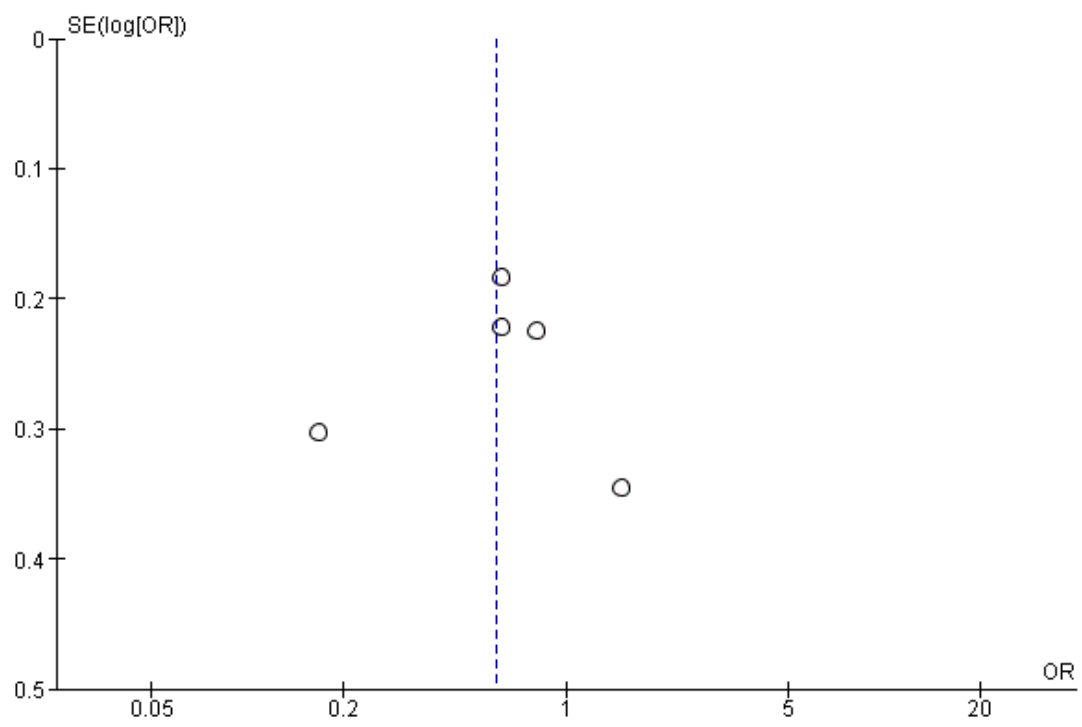

Supplement: s1 [file s1]

rs10166942 near TRPM8 gene

CC

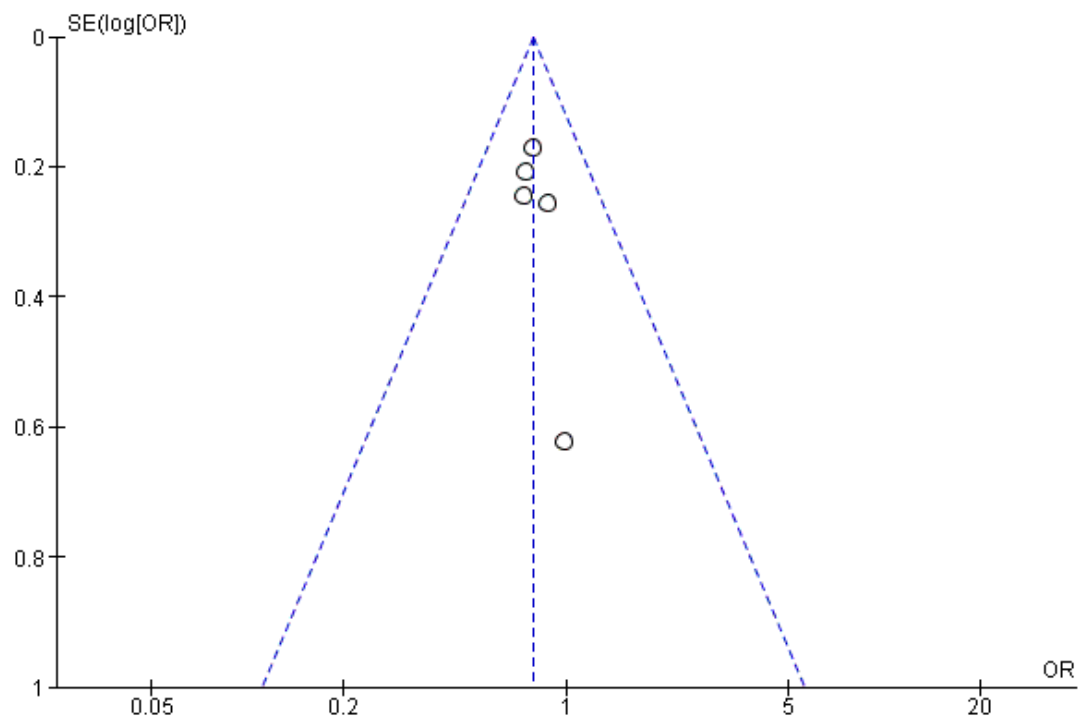

CT

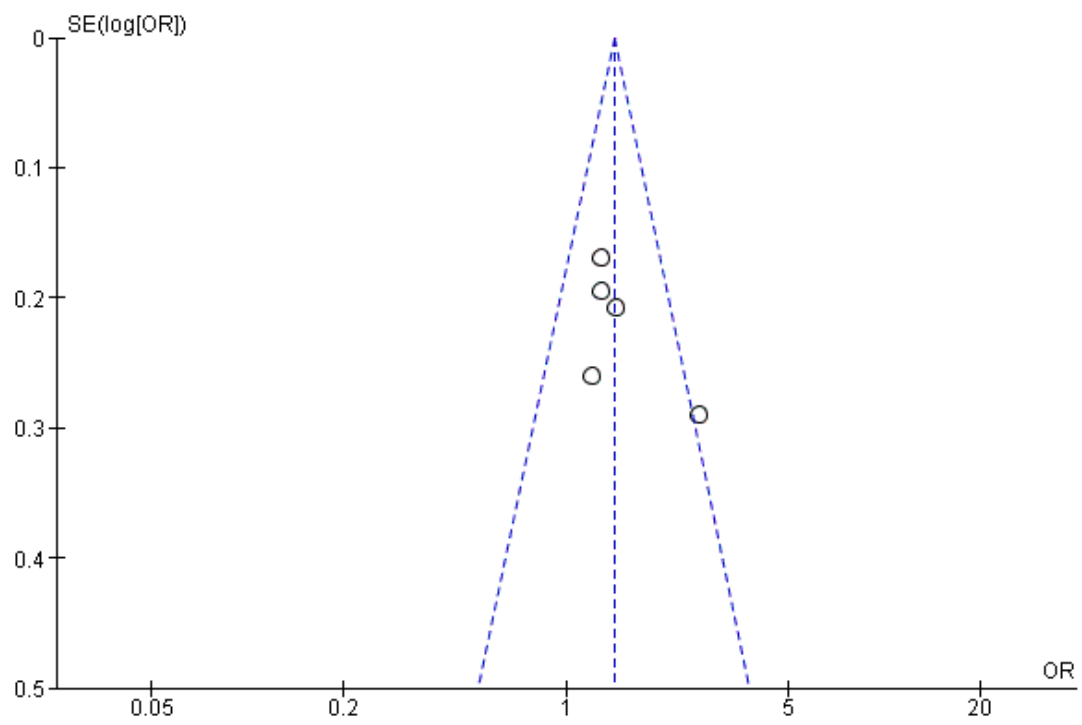

$\pi$

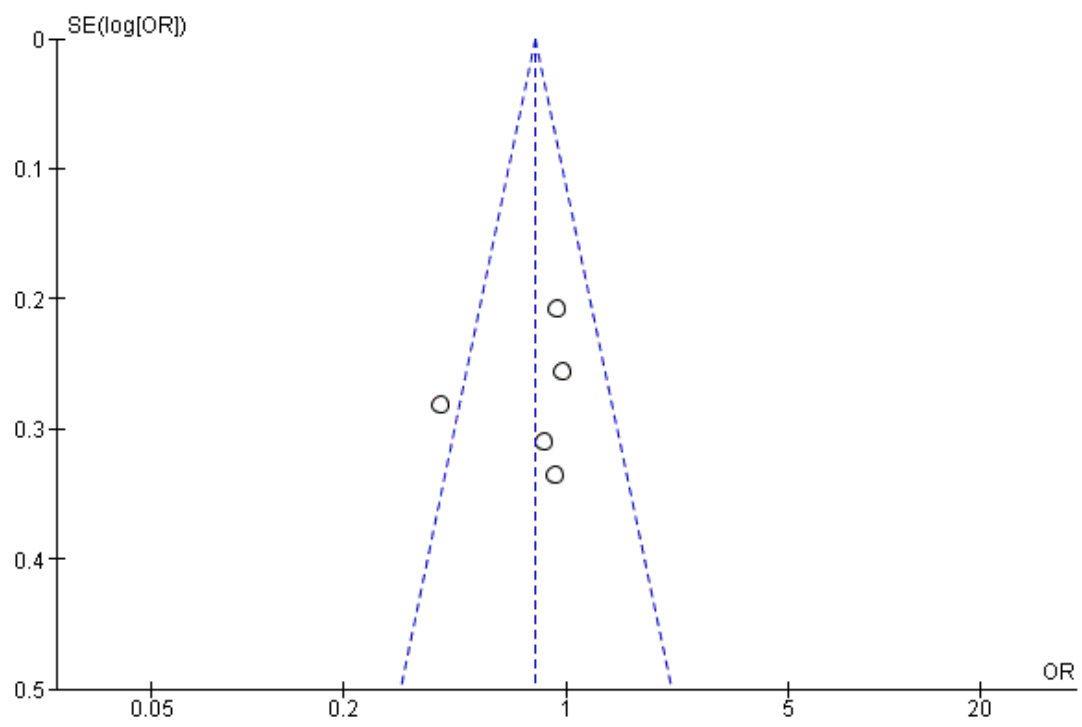

Supplement: s1 [file s1]

*LPR1 rs11172113*

*CC*

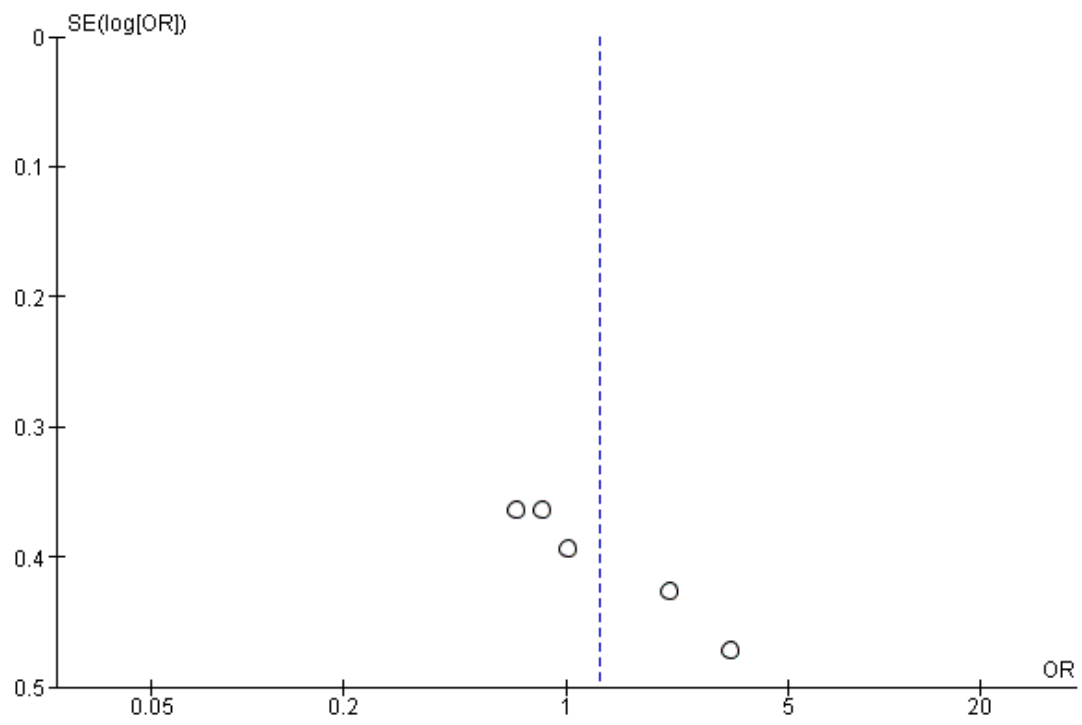

*CT*

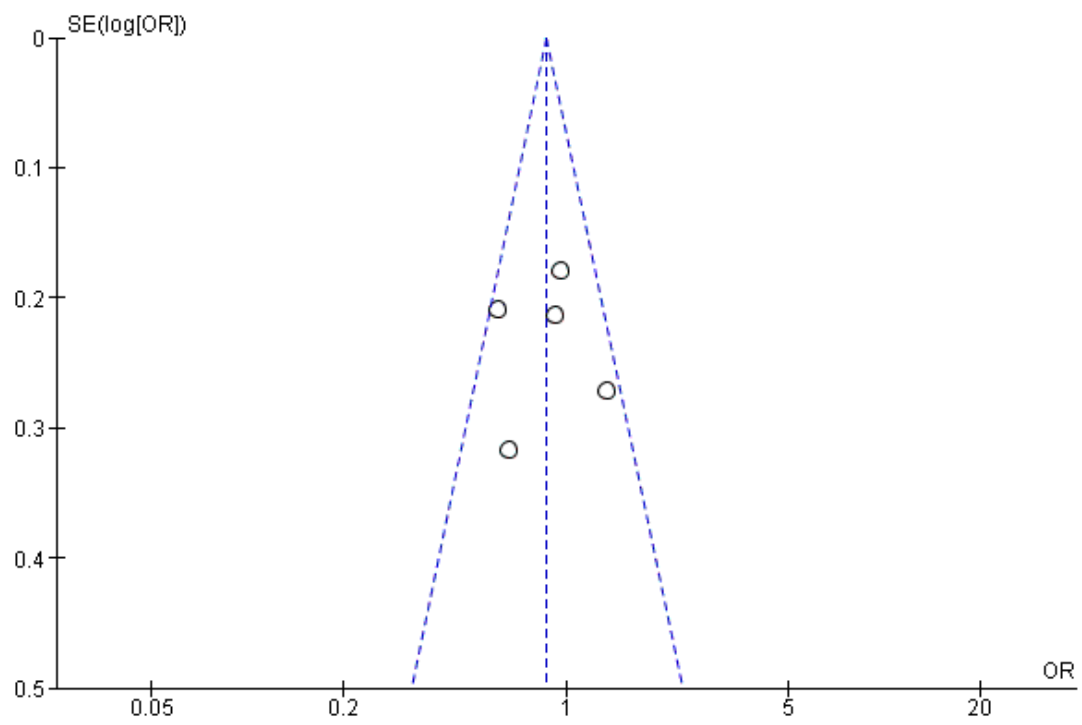

$\pi$

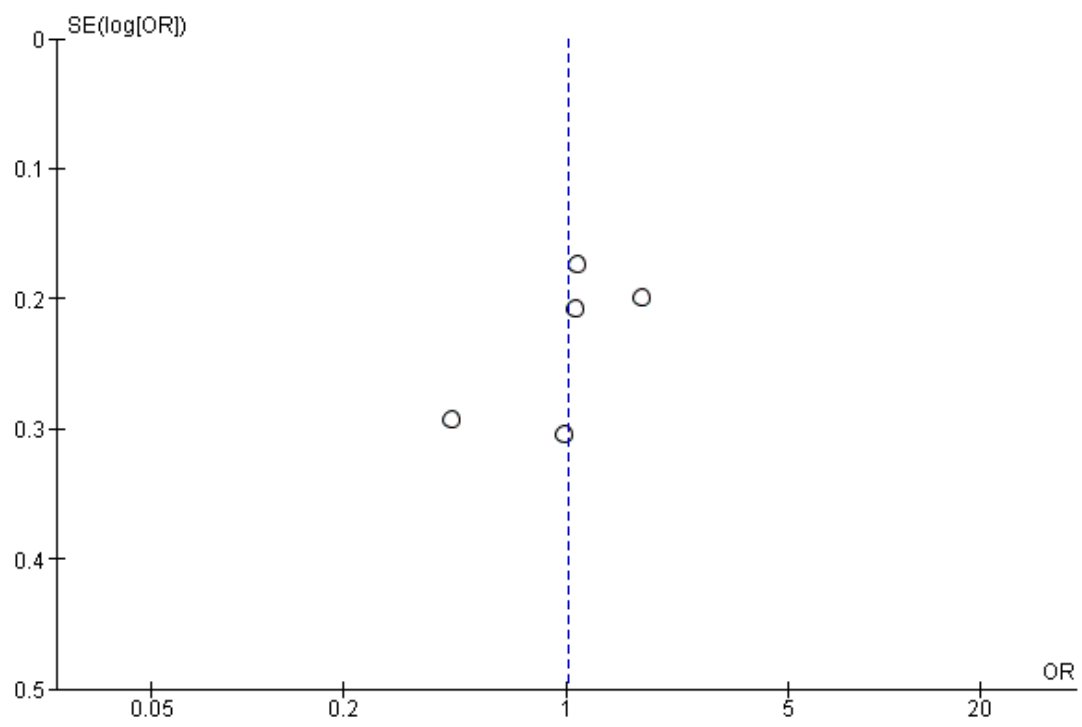

Supplement: s1 [file s1]

*LPR1 rs11172113*

*CC*

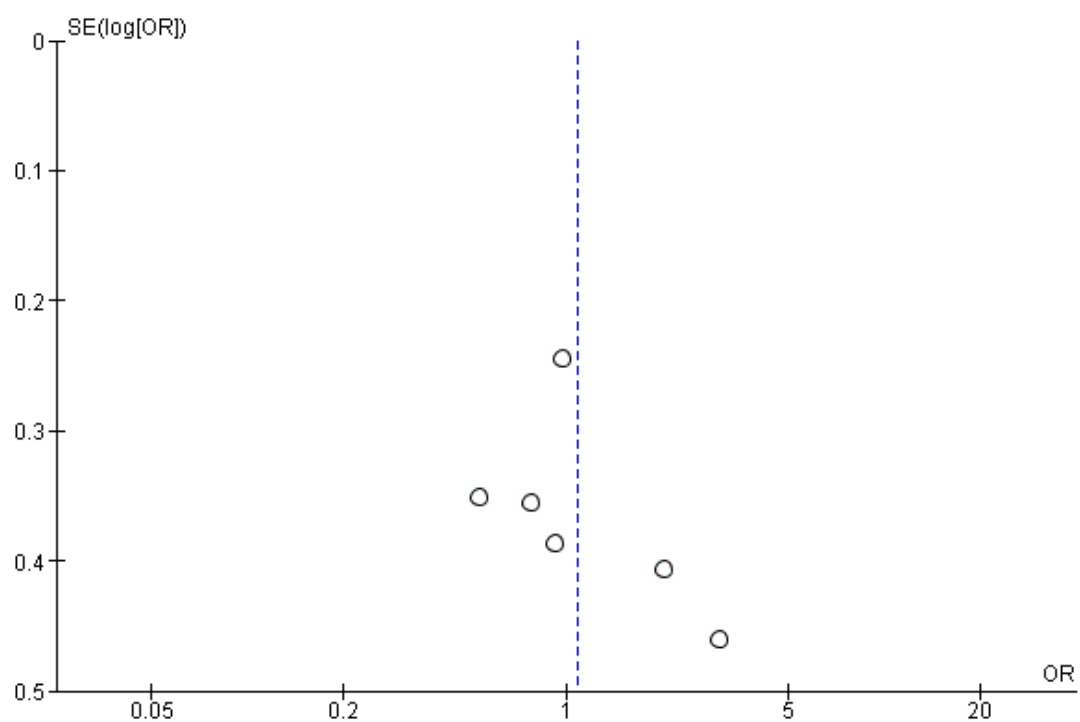

*CT*

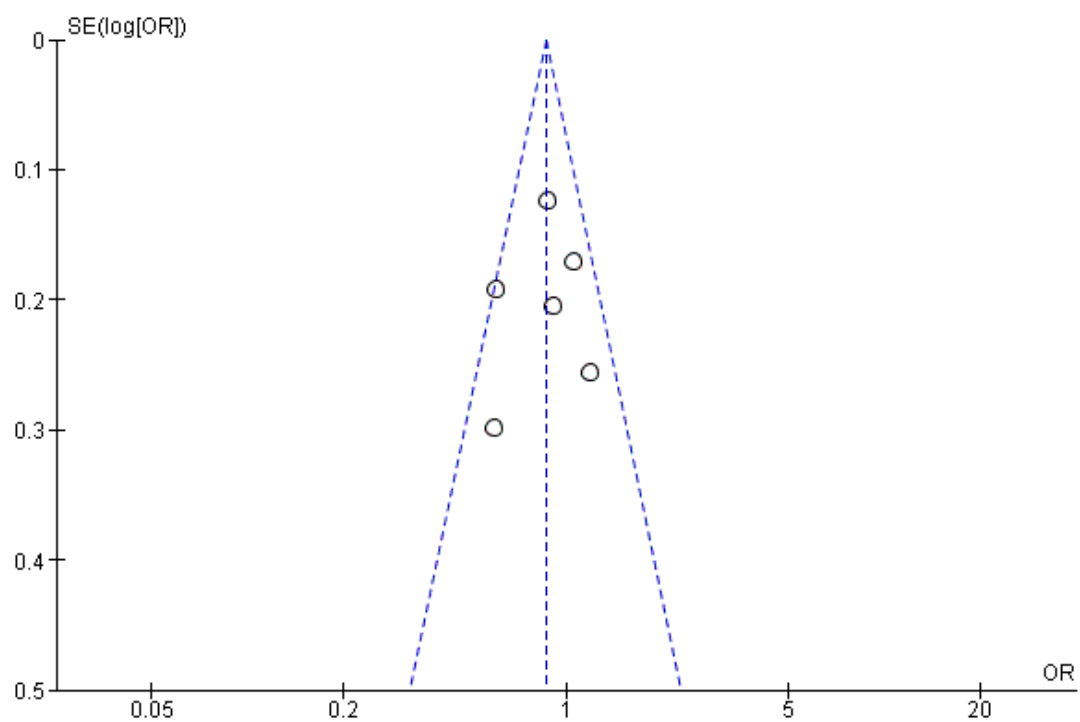

$\pi$

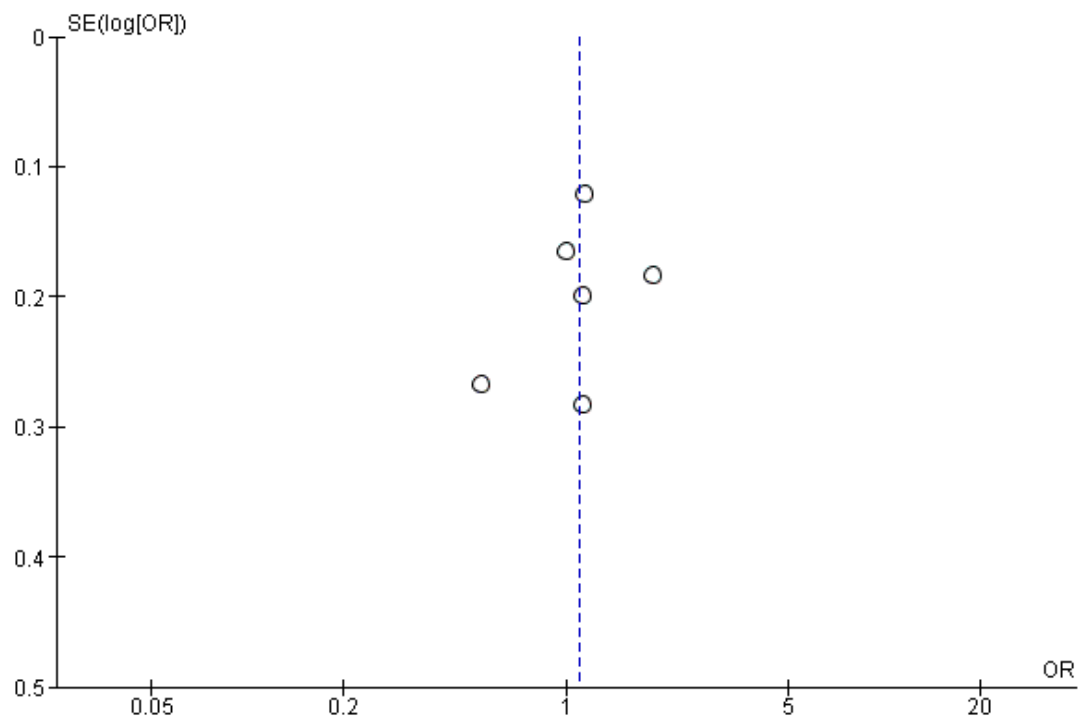

Supplement: s1 [file s1]

CC

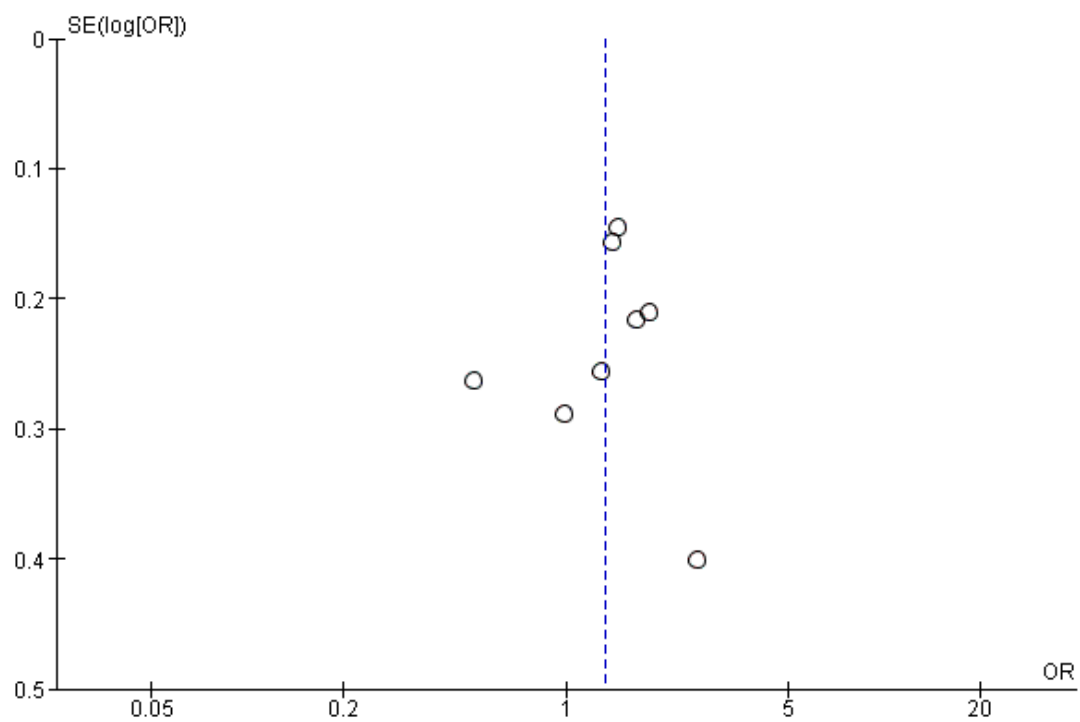

CT

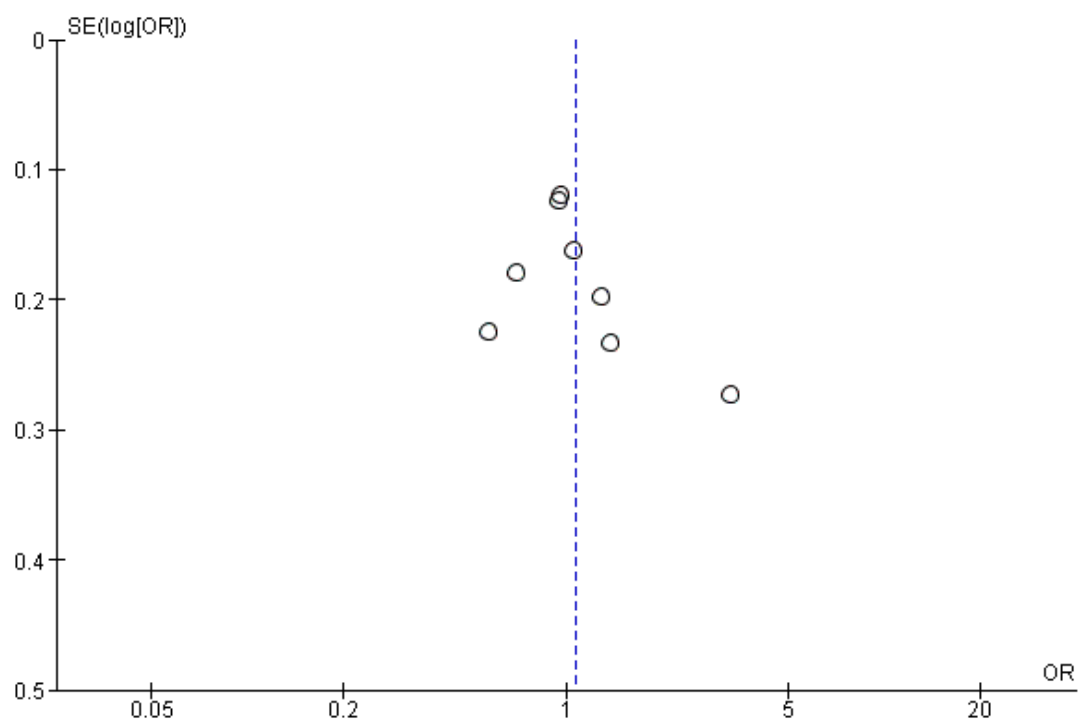

$\pi$

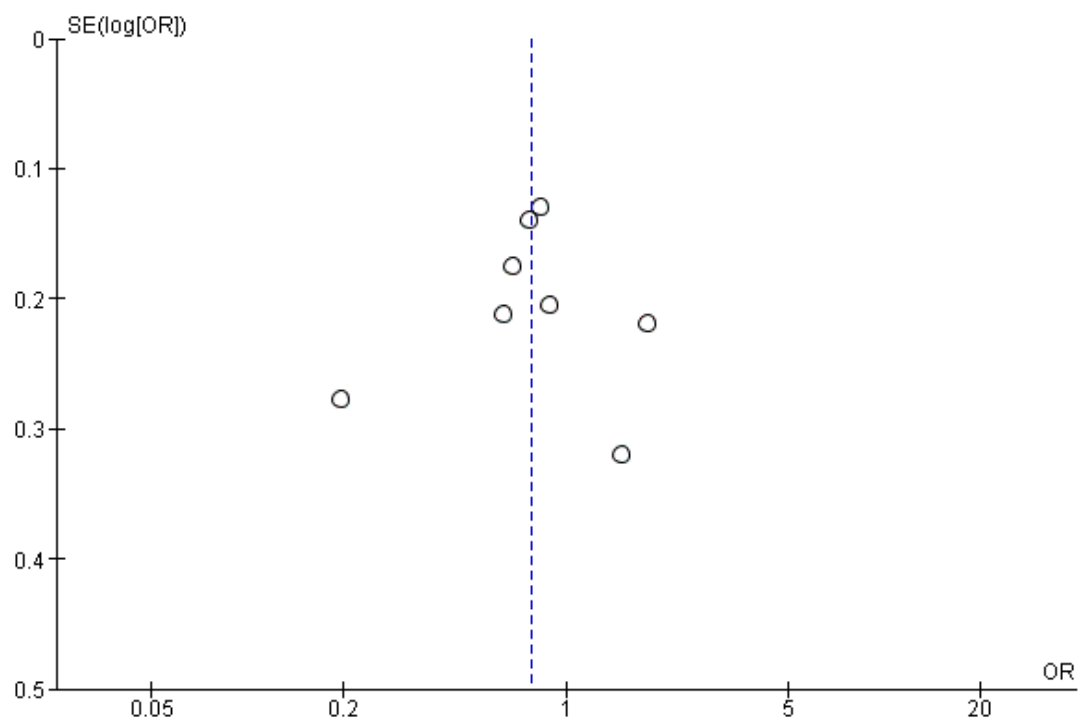

Supplement: s1 [file s1]
